# Supplementary material
Source: Research Square preprint supplement (doi:10.21203/rs.3.rs-8707172/v1)
Supplement: Supplementary file 1 [file d1e7ae37ffaf75098e63c6a8.docx]

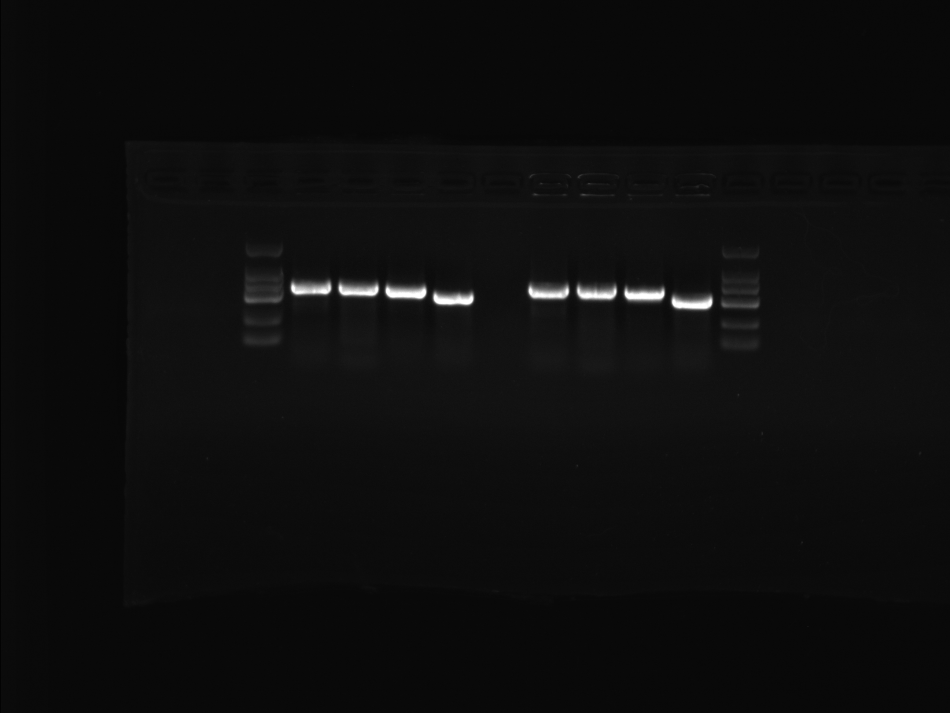


**Fig. 1C** Untreated raw electropherograms.garose gel electrophoresis of PCR amplification products of four overlapping regions (P1, P2, P3 and P4).
